# Supplementary material for: Trans-acting GC-rich non-coding RNA at var expression site modulates gene counting in malaria parasite
Source: PubMed Central journal article supplement — Nucleic Acids Res. 2016 Jul 27;44(20):9710–8. doi: 10.1093/nar/gkw664 (PMC5175341; doi:10.1093/nar/gkw664), 2016-07-27
Supplement: supp_gkw664_nar-03504-y-2015-File005.pdf [file supp_gkw664_nar-03504-y-2015-File005.pdf]

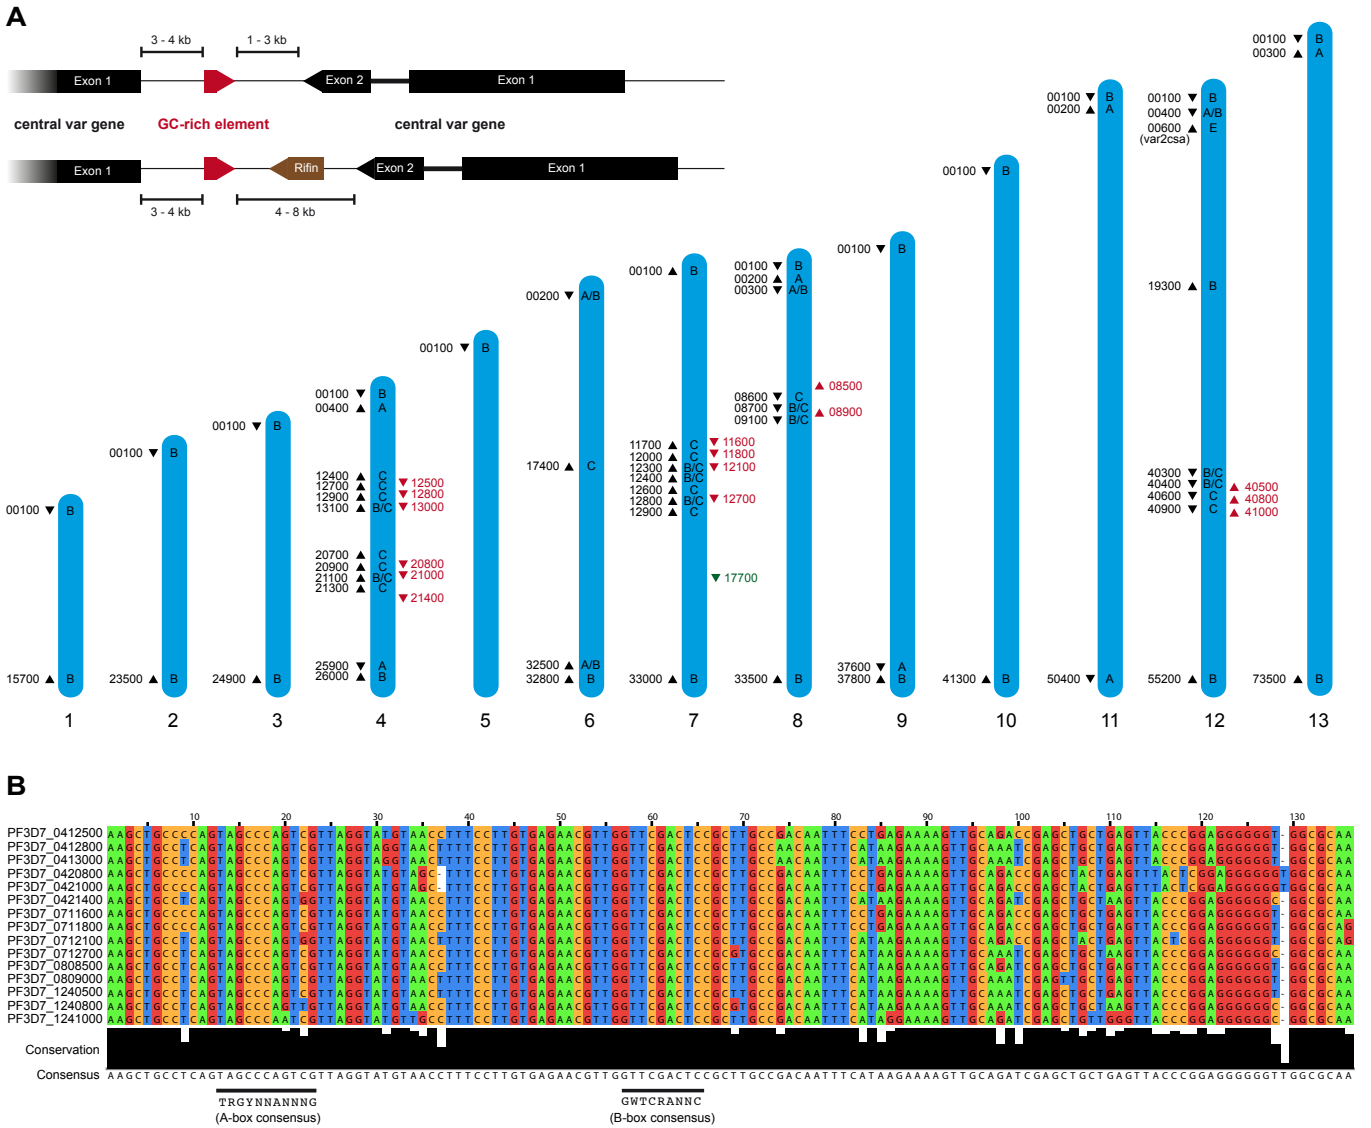

**Supplementary Figure 1.** Genomic organization and sequence alignment of GC-rich ncRNA gene family. **(A)** Genomic organization of GC-rich elements and shows proximity to central var genes. Top panel displays two occurring genomic arrangements for GC-rich elements. In most cases they are in a tail to tail conformation with the closest var gene (9/15) while sometimes (5/15) a rifin gene is intercalated between them. Schematics below show chromosomal location of var genes (black arrowheads), GC-rich ncRNA elements (red arrowheads) and T-serine ligase gene (green arrowhead) within the 3D7 genome (modified from Fastman et al., 2012). Only five last digits of gene numbers are displayed (PF3D7\_chr#xxxxx). Direction of the arrowhead indicates orientation of gene. Drawing is not to scale and chromosome 14 is omitted since it does not contain any var genes or GC-rich elements. Promoter subtype for each var genes is shown (ups A, A/B, B, B/C, C, E). **(B)** Multiple sequence alignment of highly conserved GC-rich non-coding RNA elements. 15 members of RUF-6 gene family aligned by Clustal Omega (<http://www.ebi.ac.uk>) and presented in Jalview (<http://www.jalview.org>). Degree of conservation per base and consensus sequence are displayed below. Black lines show position of potential A- and B-box consensus motifs (as assessed in Dieci et al., 2013).

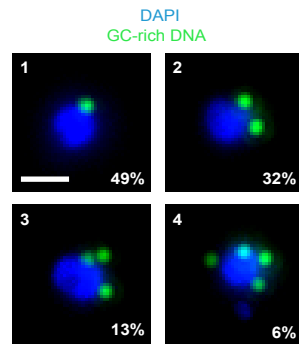

**Supplementary Figure 2.** Perinuclear clustering of GC-rich ncRNA gene loci. Fluorescent microscopy images of DNA-FISH labeling of four different ring stage parasites using a probe targeting all GC-rich elements (green). Nucleus is stained with DAPI (blue). Scale bar, 1  $\mu$ m. Percentages indicate occurrence of cells with 1,2,3, or 4 foci within the imaged population.

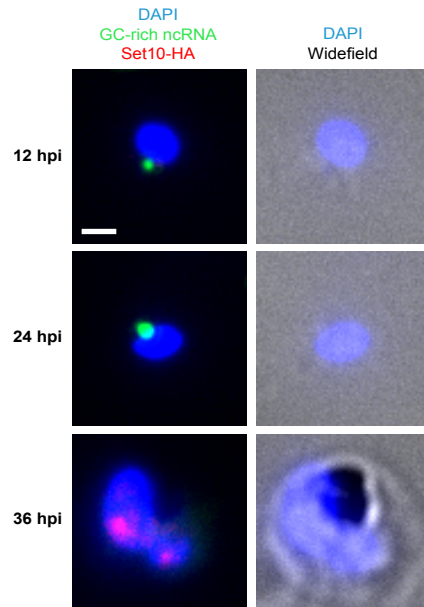

**Supplementary Figure 3.** Differential temporal expression of PfSet10 and GC-rich ncRNA. Fluorescence images show combination of RNA-FISH using probe against all GC-rich ncRNA transcripts (red) with immunolabeling of endogenously tagged PfSet10-HA using anti-HA antibody (red) for three stages of the blood stage cycle. Nucleus is stained with DAPI (blue) and overlaid with widefield on the right. Scale bar, 1  $\mu$ m. We used identical acquisition parameters and contrast settings for all images.

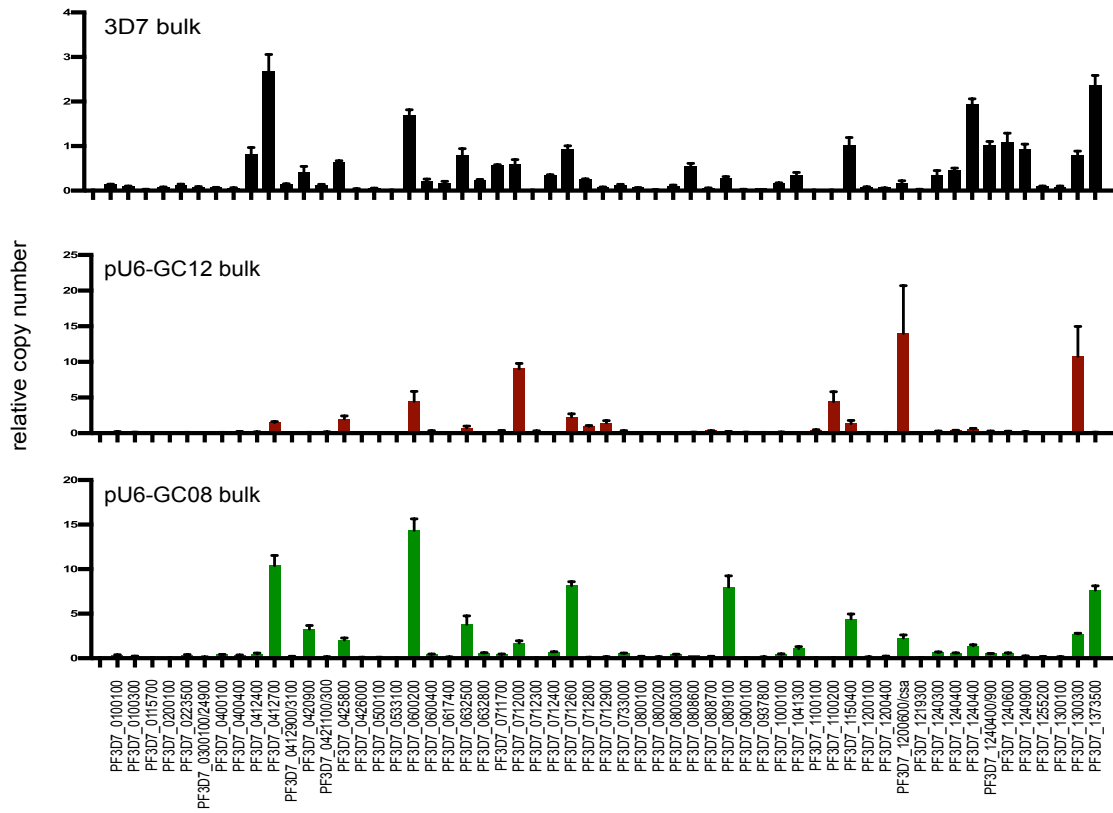

**Supplementary Figure 4.** *Var* gene mRNA profile in GC-rich ncRNA overexpressing bulk cultures and control strains. Individual *var* gene mRNA levels are quantified by real time PCR as relative copy numbers after normalization to T-Serine Ligase levels. Error bars shown standard deviation within triplicates. Limit of detection (LOD) for this data set is 0.0114 (relative copy number).

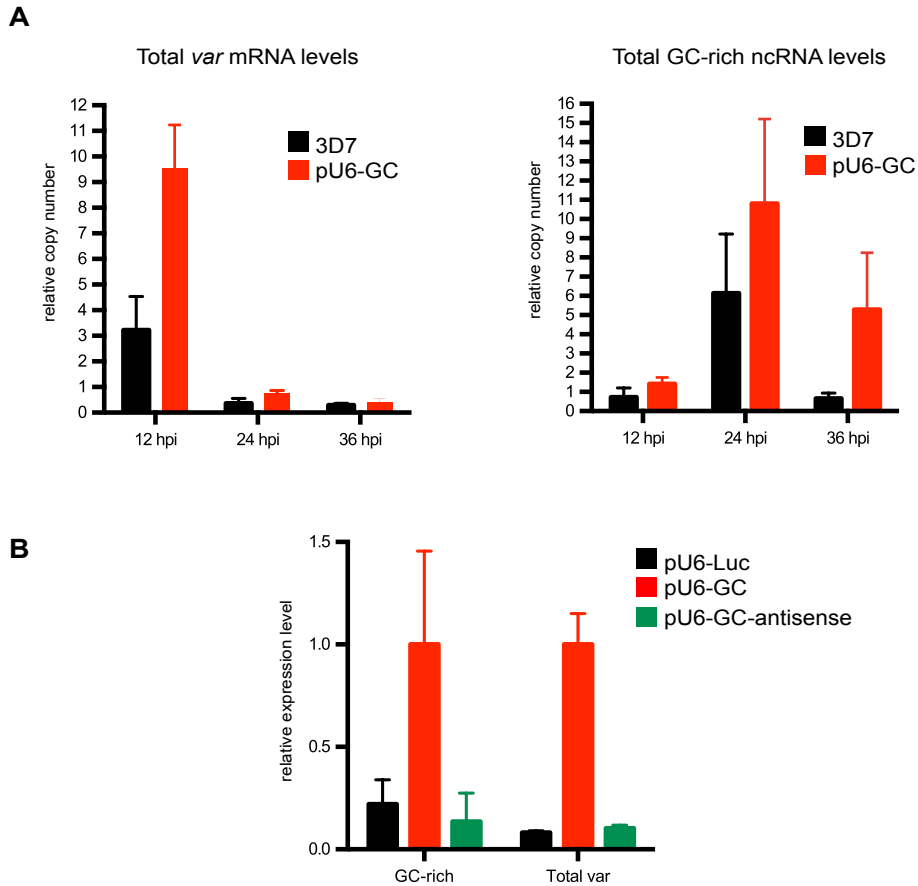

**Supplementary Figure 5.** Temporal regulation of *var* and GC-rich ncRNA gene expression is not affected by overexpression of GC-rich ncRNA or GC-rich ncRNA antisense. **(A)** Total *var* gene mRNA levels are quantified by real time PCR using ups subtype specific primers covering all genes at three timepoints of the blood stage development. *Var* mRNA levels of 3D7 wildtype (black) and GC-rich ncRNA overexpressing (orange) parasites peak at 12 hpi. GC-rich ncRNA levels are also quantified for both parasite lines and peak at 24 hpi. Limit of detection (LOD) for this data set is 0.0114 (relative copy number). **(B)** Total *var* gene mRNA and GC-rich ncRNA levels are quantified by real time PCR in three different parasite lines at 12 hpi. Control line pU6-Luc expresses luciferase fragment (black), pU6-GC line overexpresses GC1241000 ncRNA (red), and pU6-GC-antisense GC1241000 antisense transcript (green). No significant difference between pU6-Luc and pU6-GC-antisense can be detected. Graph shows relative expression levels. Limit of detection (LOD) for this graph is 0.0019 (relative expression level).

**Supplementary Table 1. Primer pairs for FISH probes**

| Target                | Forward primer              | Reverse primer              |
|-----------------------|-----------------------------|-----------------------------|
| Seryl (0717700)       | AGGAGGGAATCCTGACAAGA        | AAGAAGACAACATAAGAATC        |
| FBA (1444800)         | ATTAGCAACCACCGCCAAA         | CCTGCATTTTCACCACCTGC        |
| GC-rich-ncRNAs        | CTGCCTCAGTAGCCAGTCG         | CGGGTAACTCAGCAGCTCGAT       |
| var2csa (1200600)     | AGCTGATCCTAGTGAAGTG         | TGAAGTATCTTGTTCCAGCAG       |
| upsA-subtype var      | ATTCCATACATCCGATATAGG       | CCGAAATCACCTGTTGACCTC       |
| central var (0412700) | CTA GTG GAT GAG GAT TGG GTG | CTA GTG GAT GAG GAT TGG GTG |
| GC-rich 5'UTR F1      | GAATTTGGTCTAGTTTGTCTA       | GTCGAACCAACGTTCTCA          |
| GC-rich 5'UTR F2      | GAATTTGGTCTGGTTTGTCTAT      | GTCGAACCAACGTTCTCA          |
| upsA var (1300300)    | AAGTCACAACAGTGCAAGGG        | ACAATCGTAACCCTCACGAC        |
| upsC var (0712000)    | CGCCTACAAGTGATGGTGGT        | TACTTGCATCAGTTCCGCGA        |
| upsA var (0600200)    | GCAACGTGCCGAAGATTCTAA       | TGCATTTATTCGAACACGGAGT      |
| upsC var (0808600)    | GGTTGGTGGTAGTCCACAGG        | TCCACGACATTTTGTATCGCA       |

**Supplementary Table 2. Real time PCR primer pairs**

| Target             | Forward primer        | Reverse primer         |
|--------------------|-----------------------|------------------------|
| Seryl (0717700)    | AAGTAGCAGGTCATCGTGGTT | TTCGGCACATTCTTCCATAA   |
| FBA(1444800)       | TGTACCACCAGCCTTACCAG  | TTCCTTGCCATGTGTTCAAT   |
| GC-rich-ncRNA-A    | AAGCTGCCTCAGTAGCCCA   | AAAAATTGCGCCACCCCC     |
| GC-rich-ncRNA-B    | AAGCTGCCCCAGTAGCCCA   | AAAAATTGCGCCGCCCC      |
| <b>Var genes</b>   |                       |                        |
| PF3D7_1240400/900  | AAAGCCACTAGCGAGGGTAA  | TGTTTTGCCACTCCTGTA     |
| PF3D7_1240600      | CATCCATTACGCAGGATACG  | AAATAGGGTGGGCGTAACAC   |
| PF3D7_1300300      | CACAGGTATGGGAAGCAATG  | CCATACAGCCGTGACTGTTC   |
| PF3D7_0412700      | TAAAGACGCCAACAGATGC   | TCATCGTCTTCGTCTTCGTC   |
| PF3D7_0412900/3100 | ACTTTCTGGTGGGAATCAG   | TTCACCGCCACTTCATTAG    |
| PF3D7_0425800      | AAACACGTTGAATGGCGATA  | GACGCCGAGGAGGTAAATAG   |
| PF3D7_0500100      | GAAGCTGGTGGTACTGACGA  | TATTTTCCACCAGGAGGAG    |
| PF3D7_0632500      | ATGTGTGCGAGATGAAG     | TGCCTTCTAGGTGGCATAACA  |
| PF3D7_0421100/300  | ACCAAGTGGTGACAAAGCAG  | GGGTGGCACACAAACTACTAC  |
| PF3D7_0617400      | ATTTGTGCGACATGAAGGAA  | AACTTCGTGCCAATGCTGTA   |
| PF3D7_0412400      | ACCGCCCCATCTAGTGATAG  | CACCTTGGTATGTGGTGTCA   |
| PF3D7_0420900      | AGAGGGTTATGGGAATGCAG  | GCATTCTTTGGCAATTCCTT   |
| PF3D7_0533100      | AAGAAAGTGCCACAACATGC  | GTTTCGTACGCCTGTCTGTTTA |
| PF3D7_0937800      | CACACGTGGACCTCAAGAAC  | AAAACCGATGCCAATACTCC   |
| PF3D7_0600200      | TGGAAGAAGCATGGACCTGA  | TTCCTCGAGGGAAGAATCAC   |
| PF3D7_1200600      | TGGTGATGGTACTGCTGGAT  | TTTATTTTCGGCAGCATTTG   |
| PF3D7_0712800      | ACGTGGTGGAGACGTAACA   | CCTTTGTTGTTGCCACTTTG   |
| PF3D7_0712400      | GCGACGCTCAAAAACATTTA  | TCATCCAACGCAATCTTTGT   |
| PF3D7_1200400      | TCGATTATGTGCCGAGTAT   | TTCCCGTACAATCGTATCCA   |
| PF3D7_0600200      | TGGAAGAAGCATGGACCTGA  | TTCCTCGAGGGAAGAATCAC   |
| PF3D7_0100300      | TCATTATGGGAAGCACGATT  | TGATTTCTACCATCGCAAGG   |
| PF3D7_0712000      | GTTGAGTCTGCGGCAATAGA  | CTGGGGTTTTGTCAACTCTG   |
| PF3D7_0712600      | CGTGGTAGTGAAGCACCATC  | CCCACCTTCTGTGGTTTTCT   |
| PF3D7_0711700      | CAATTTTTCCGACGCTTGTA  | CACATATAGCGCCGTCCTTA   |
| PF3D7_0712900      | CACACATGTCCACCACAAGA  | ACCCTTCTGTGGTGTCTTCC   |
| PF3D7_0808600      | CCTAAAAAGACGCAGAAGG   | CCAGCAACACTACCACCAGT   |
| PF3D7_0712300      | GGTGGAGGTAGTCCACAGGA  | CAGCTATTTCCACCAGAA     |
| PF3D7_0809100      | TGCAAGGGTGCTAATGGTAA  | CCTGCATTTTGACATTCGTC   |
| PF3D7_0808700      | TTTGTCCGGAAGACGATACA  | ATCTGGGGCAGAATTACCAC   |
| PF3D7_1240300      | AGCAAAATCCGAAGCAGAAT  | CCCACAGATCTTTCTCGT     |
| PF3D7_0800200      | GGTGTCAAGGCAGCTAATGA  | TATGTCCTGCGCTATTTTGC   |
| PF3D7_0400400      | ATATGGGAAGGGATGCTCTG  | TGAACCATCGAAGGAATTGA   |
| PF3D7_1100200      | GACGGCTACCACAGAGACAA  | CGTCATCATCGTCTTCGTTT   |
| PF3D7_0600400      | CGTAAAACATGGTGGGATGA  | GGCCATTAGTTAACCATC     |
| PF3D7_1150400      | TGCTGAAGACCAATTGAGC   | TTGTTGTGGTGGTGTGTTG    |
| PF3D7_0632800      | GACAAATACGGCGACTACGA  | TGTTTCACCCATTCTTCAA    |
| PF3D7_0733000      | TGACGACGATAAATGGGAAA  | TTCTTTGGAGCAGGGAGTT    |
| PF3D7_0800100      | GTCGTGGAAAAACGAAAGGT  | TATCTATCCAGGGCCCAAAG   |
| PF3D7_1000100      | GACGAGGAGTCGAAAAGAC   | TGGACAGGCTTGTGAGAG     |
| PF3D7_1041300      | GTGCACCAAAAAGACTCAA   | ACAAAACCTCTGCCATT      |
| PF3D7_1100100      | GAGGCTTATGGGAAACCAGA  | AGGCAGTCTTTGGCATCTTT   |
| PF3D7_1300100      | ACAAAGGAACGTCCATCTCC  | GCCAATACTCCACATGATCG   |
| PF3D7_1373500      | CGGAATTAGTTGCCCTTACA  | CATTGGCCACCAAGTGATC    |
| PF3D7_0100100      | TGCGCTGATAACTACAACA   | AGGGGTTTCATCGTCATCTTC  |
| PF3D7_0115700      | AACCCCAATACCATTACGA   | TTCCCACTCATGTAACCAA    |
| PF3D7_0200100      | ATGTGCGCTACAAGAAGCTG  | TTGATCTCCCATTCAGTCA    |
| PF3D7_0223500      | CAATTTTGGGTGTGGAATCA  | CACTGGCCACCAAGTGATC    |

|                     |                         |                          |
|---------------------|-------------------------|--------------------------|
| PF3D7_0300100/24900 | CAATCTGCGGCAATAGAGAC    | CCACTGTTGAGGGGTTTTCT     |
| PF3D7_0400100       | GACGACGATGAAGACGAAGA    | AGATCTCCGCATTTCCAATC     |
| PF3D7_0426000       | TGACGACTCCTCAGACGAAG    | CTCCACTGACGGATCTGTTG     |
| PF3D7_0900100       | TGCAAACCACCAGAAGAAAG    | GTTCTCCGTGTTGTCCTCCT     |
| PF3D7_1200100       | CGGAGGAGGAAAAACAAGAG    | TGCCGTATTTGAGACCACAT     |
| PF3D7_1219300       | GACGCCTGCACTCTCAAATA    | TTGGAGAGCACCACCATTTA     |
| PF3D7_1255200       | GGCACGAAGTTTTGCAGATA    | TTTGTGCGTCTTTCTTCGTC     |
| PF3D7_0800300       | TTTGGGATGACACCAAGAAA    | GTCGCTTGATGAAGGAGTCA     |
| PF3D7_1240400       | TGCCGACAAGCCAAATACCG    | CAAAAGCTTCTGCCCATTCCTC   |
| PF3D7_1240400       | ACCGCCTTTGAAGAGGACGATG  | TTGGTGCTGGTGTGCTGGAC     |
| PF3D7_1240900       | CAAAATGGTAGTGATGGTGGTCG | CCCCCTGCTTATTATCTTTTCGTC |

### Var ups subtypes

|         |                              |                            |
|---------|------------------------------|----------------------------|
| upsA-1  | TTGGGRAATBTGTTAGTTAYRGCAA    | CTGCAAACTKCGWGCAAG         |
| upsA-2  | AACCCATCTGRRATGATATACCTATGGA | GTTCCAASGATCCATTRGATGTATTA |
| upsB-1  | CATCCGCCATGCAAGTATAA         | CGTGCACGATTCGATTTTTTG      |
| upsB-2  | ATCAAGGTAATTCATACATATGTGATA  | GTCCGTGCACGATTCGATTTT      |
| upsBC-1 | AATGATCGGTGTAACCACTATC       | GACAAAACTTTCACCCAATAGA     |
| upsBC-2 | CATCTGTTGCAAATTTATTCCAAATAC  | TCAGTAGTATCAGACATAAATGCATA |
| upsC-1  | CACATCGATTACATTTTAGCGTTT     | TGTGGTAATATCATGTAATGG      |
| upsC-2  | CATTGTAAACATAGTCTACCATTA     | GTAGCGACAACCACGRYATCATGG   |
